# Supplementary material for: Butyrate producing colonic Clostridiales metabolise human milk oligosaccharides and cross feed on mucin via conserved pathways
Source: PubMed Central journal article supplement (PMC7335108; doi:10.1038/s41467-020-17075-x), 2020-07-03
Supplement: 41467_2020_17075_MOESM1_ESM.pdf [file 41467_2020_17075_MOESM1_ESM.pdf]

**Supplementary Information for:**

**Butyrate producing colonic Clostridiales metabolise human milk oligosaccharides and cross feed on mucin via conserved pathways**

Pichler M.J. et al.

## Supplemental Information:

### Supplementary Tables:

**Supplementary Table 1: Human milk and blood antigen oligosaccharides studied in this work**

| Compound <sup>a</sup>               | Abbreviation             | Supplier                          | Structure <sup>b</sup>                                                                |
|-------------------------------------|--------------------------|-----------------------------------|---------------------------------------------------------------------------------------|
| Lactose                             | Lac                      | Sigma Aldrich                     |    |
| 2'-Fucosyllactose                   | 2'FL                     | IsoSep                            |    |
| 3-Fucosyllactose                    | 3FL                      | IsoSep                            |    |
| 3'-Sialyllactose                    | 3'SL                     | Carbosynth                        |    |
| 6'-Sialyllactose                    | 6'SL                     | Carbosynth                        |    |
| Difucosyllactose                    | DFL                      | Dextra Laboratories               |    |
| Lacto- <i>N</i> -biose              | LNB                      | Elicityl                          |    |
| Galacto- <i>N</i> -biose            | GNB                      | Sigma Aldrich                     |    |
| Lacto- <i>N</i> -tetraose           | LNT                      | Elicityl<br>IsoSep                |    |
| Lacto- <i>N</i> -neotetraose        | LNnT                     | Dextra Laboratories               |  |
| Lacto- <i>N</i> -fucopentaose I     | LNFP I                   | Dextra Laboratories               |  |
| Lacto- <i>N</i> -fucopentaose II    | LNFP III                 | Honeywell Fluka                   |  |
| Lacto- <i>N</i> -fucopentaose III   | LNFP III                 | Carbosynth                        |  |
| Lacto- <i>N</i> -difucohexaose I    | LNDFH I                  | Dextra Laboratories<br>Carbosynth |  |
| Lacto- <i>N</i> -difucohexaose II   | LNDFH II                 | Elicityl<br>Dextra Laboratories   |  |
| Blood group antigen H triose type 1 | H triose type 1          | Elicityl                          |  |
| Blood group antigen A triose        | A triose                 | Elicityl                          |  |
| Lewis A antigen triose              | Le <sup>a</sup> triose   | Elicityl                          |  |
| Lewis B antigen tetraose            | Le <sup>b</sup> tetraose | Carbosynth                        |  |

<sup>a</sup>All carbohydrates were > 95% pure unless otherwise stated.

<sup>b</sup>Glycan structures presentation according to Symbol Nomenclature for Glycans (SNFG) (<https://www.ncbi.nlm.nih.gov/glycans/snfg.html>)

**Supplementary Table 2: Binding and thermodynamic parameters of *Rh*LNBBP determined by ITC.**

| Ligand  | $K_D$ ( $\mu\text{M}$ ) | $N_0$       | $\Delta H$                | $-T\Delta S$              | $\Delta G$                |
|---------|-------------------------|-------------|---------------------------|---------------------------|---------------------------|
|         |                         |             | (kcal mol <sup>-1</sup> ) | (kcal mol <sup>-1</sup> ) | (kcal mol <sup>-1</sup> ) |
| LNB     | 2.64 ± 0.39             | 0.77 ± 0.01 | -30.37 ± 0.66             | 22.75                     | -7.62                     |
|         | 3.12 ± 0.48             | 0.94 ± 0.01 | -28.14 ± 0.56             | 20.63                     | -7.51                     |
| GNB     | 11.11 ± 0.57            | 1.26 ± 0.02 | -12.28 ± 0.31             | 5.52                      | -6.76                     |
|         | 10.92 ± 0.61            | 1.24 ± 0.02 | -13.58 ± 0.28             | 6.83                      | -6.75                     |
| LNT     | 10.95 ± 0.43            | 0.89 ± 0.01 | -19.12 ± 0.21             | 12.34                     | -6.78                     |
|         | 9.71 ± 0.26             | 0.86 ± 0.00 | -19.60 ± 0.11             | 12.76                     | -6.84                     |
| Lactose | n.b.                    |             |                           |                           |                           |
| 2'FL    | n.b.                    |             |                           |                           |                           |

Data are from independent duplicates and binding parameters are reported with the error of the fit to the binding isotherm. n.b.: Affinity too low to be determined.  $N_0$ : Is the molar binding stoichiometry.

**Supplementary Table 3: Binding parameters of *RiLe*<sup>a/b</sup>BP determined by SPR**

| Ligand                       | $K_D$ ( $\mu\text{M}$ ) | $R_{\text{max}}$ | $\chi^2$ |
|------------------------------|-------------------------|------------------|----------|
| LNB                          | 6.63 ± 0.68             | 10.4             | 0.10     |
|                              | 6.91 ± 0.84             | 9.7              | 0.12     |
| GNB                          | 10.82 ± 0.77            | 10.4             | 0.06     |
|                              | 10.21 ± 0.77            | 8.8              | 0.03     |
| Le <sup>b</sup> tetraose     | 1.77 ± 0.12             | 25.4             | 0.45     |
|                              | 1.75 ± 0.17             | 24.8             | 0.51     |
| Le <sup>a</sup> triose       | 3.31 ± 0.46             | 17.3             | 0.32     |
|                              | 2.99 ± 0.38             | 17.6             | 0.47     |
| H triose type I              | 11.2 ± 1.1              | 8.8              | 0.06     |
|                              | 11.3 ± 1.5              | 9.0              | 0.12     |
| LNT                          | n.b.                    |                  |          |
| Blood group A antigen triose | n.b.                    |                  |          |
| 2'FL                         | n.b.                    |                  |          |
| 3'FL                         | n.b.                    |                  |          |
| LNT                          | n.b.                    |                  |          |
| Lactose                      | n.b.                    |                  |          |

Data are from independent duplicates and binding parameters are reported with the standard error of the fit to a one binding site model. n.b.: Indicates low affinity to ligand precluding determination of binding parameters.  $R_{\text{max}}$  and  $\chi^2$ : Denote the maximum binding level and the statistical goodness of the fit to a one binding site model, respectively.

**Supplementary Table 4. Kinetic parameters of *RhLnb136*, *RiLe<sup>a/b</sup>136* and *ErLnb136***

| Substrate | Enzyme                       | $K_M$<br>(mM) | $k_{cat}$<br>(s <sup>-1</sup> ) | $k_{cat}/K_M$<br>(s <sup>-1</sup> mM <sup>-1</sup> ) | specific activity <sup>a</sup><br>(U mg <sup>-1</sup> ) |
|-----------|------------------------------|---------------|---------------------------------|------------------------------------------------------|---------------------------------------------------------|
| LNT       | <i>RhLnb136</i>              | 1.45 ± 0.05   | 86 ± 1                          | 59.3                                                 | 58.5 ± 0.58                                             |
| LNT       | <i>RiLe<sup>a/b</sup>136</i> | -             | -                               | -                                                    | 0.21 ± 0.00                                             |
| LNT       | <i>ErLnb136</i>              | 0.68 ± 0.07   | 160 ± 7                         | 235.3                                                |                                                         |
| LNT       | <i>ErLnb136</i> Y145A        | n.d.          | n.d.                            | 48                                                   |                                                         |

<sup>a</sup> specific activity determined towards 3.5 mM LNT. n.d.: Lack of curvature of the Michaelis Menten plot preclude determination of kinetic parameters. Data are means of triplicates with standard deviation (SD).

**Supplementary Table 5. Specific activities of *RhGLnbp112* and *RiGLnbp112***

| Substrate | <i>RhGLnbp112</i><br>(U mg <sup>-1</sup> ) | <i>RiGLnbp112</i><br>(U mg <sup>-1</sup> ) |
|-----------|--------------------------------------------|--------------------------------------------|
| LNB       | 12.2 ± 0.5                                 | 22.6 ± 0.2                                 |
| GNB       | 9.6 ± 0.1                                  | 16.9 ± 0.4                                 |

Data are means of triplicates with standard deviation (SD). Specific activities determined towards 2 mM LNB or GNB.



**Supplementary Table 6: Crystallographic data collection and refinement statistics.**

|                                               | <i>ErLnb136 Se-Met</i>                       | <i>ErLnb136 Native</i>                                    |
|-----------------------------------------------|----------------------------------------------|-----------------------------------------------------------|
| <b>PDB ID</b>                                 | 6KQS                                         | 6KQT                                                      |
| <b>Data collection<sup>a</sup></b>            |                                              |                                                           |
| Beamline                                      | SLS X06DA                                    | KEK-PF BL5A                                               |
| Wavelength (Å)                                | 0.978                                        | 1.000                                                     |
| Space group                                   | <i>P3<sub>1</sub>21</i>                      | <i>P3<sub>1</sub>21</i>                                   |
| Unit cell (Å)                                 | <i>a</i> = <i>b</i> = 132.7, <i>c</i> = 82.5 | <i>a</i> = <i>b</i> = 132.3, <i>c</i> = 82.2              |
| Resolution (Å)                                | 45.75–1.40 (1.42–1.40)                       | 50.0–2.00 (2.03–2.00)                                     |
| <i>R</i> <sub>merge</sub>                     | 0.145 (1.909)                                | 0.233 (1.065)                                             |
| Number of observations                        | 3,288,573 (155,651)                          | 556,706                                                   |
| Unique reflections                            | 153,888 (8,031)                              | 56,318 (2,757)                                            |
| Mean <i>I</i> / $\sigma$ ( <i>I</i> )         | 12.2 (1.7)                                   | 13.4 (3.0)                                                |
| CC (1/2)                                      | 0.999 (0.728)                                | 0.980 (0.824)                                             |
| Completeness (%)                              | 100.0 (100.0)                                | 100.0 (100.0)                                             |
| Multiplicity                                  | 20.1 (19.4)                                  | 9.9 (9.6)                                                 |
| Anomalous completeness (%)                    | 100.0 (100.0)                                | –                                                         |
| Anomalous multiplicity                        | 10.2 (9.8)                                   | –                                                         |
| <b>Refinement</b>                             |                                              |                                                           |
| Resolution                                    | 47.20–1.40                                   | 47.04–2.00                                                |
| No. of reflections                            | 155,798                                      | 53,440                                                    |
| <i>R</i> factor/ <i>R</i> <sub>free</sub> (%) | 14.8 (17.2)                                  | 14.3 (18.1)                                               |
| No. of atoms                                  | 5,920                                        | 5,787                                                     |
| No. of solvents                               | 835 (water), 1 (glycerol)                    | 706 (water), 1 (triethylene glycol), 1 (Na <sup>+</sup> ) |
| RMSD from ideal values                        |                                              |                                                           |
| Bond lengths (Å)                              | 0.016                                        | 0.011                                                     |
| Bond angles (°)                               | 1.975                                        | 1.63                                                      |
| Ramachandran plot (%)                         |                                              |                                                           |
| Favored                                       | 95.9                                         | 95.8                                                      |
| Allowed                                       | 4.1                                          | 4.2                                                       |
| Outlier                                       | 0                                            | 0                                                         |

<sup>a</sup>Values in parentheses are for the highest resolution shell.

**Supplementary Table 7: Summary of structural similarity Dali server search of *ErLnb136*.**

| Protein                                                | Source organism                     | PDB (chain) | Z score | RMSD (Å) | $N_{\text{align}}^a$ | $\%_{\text{seq}}^b$ |
|--------------------------------------------------------|-------------------------------------|-------------|---------|----------|----------------------|---------------------|
| <b><i>ErLnb136</i><sub>I</sub> (residues 7-224)</b>    |                                     |             |         |          |                      |                     |
| SurA-like putative peptidyl-prolyl cis-trans isomerase | <i>Helicobacter pylori</i>          | 5EZ1 (A)    | 7       | 3.2      | 70                   | 19 (6)              |
| Hypothetical protein LIC12922                          | <i>Leptospira interrogans</i>       | 3NRK (A)    | 5.8     | 4.8      | 105                  | 10 (5)              |
| <b><i>ErLnb136</i><sub>II</sub> (residues 242-663)</b> |                                     |             |         |          |                      |                     |
| LnbX (GH136)                                           | <i>Bifidobacterium longum</i>       | 5QQC (H)    | 50.3    | 1.4      | 416                  | 44 (43)             |
| $\alpha$ -L-fucosidase BT_1002 (GH141)                 | <i>Bacteroides thetaiotaomicron</i> | 5MQP (F)    | 32      | 3.1      | 312                  | 16 (12)             |

Data were obtained using Dali server.

<sup>a</sup>Number of aligned residues

<sup>b</sup>Sequence identity of aligned residues and the corresponding overall (global) sequence identity showed in parenthesis

**Supplementary Table 8. Primers for cloning and mutagenesis.**

| Locus tag/Primer name            | Accession <sup>a</sup> | Designation                               | Orientation | Sequence (5'->3')                          |
|----------------------------------|------------------------|-------------------------------------------|-------------|--------------------------------------------|
| RHOM_04115_FP                    | G2T0V1                 | <i>RhLnb136<sub>II</sub></i>              | Forward     | AGGAGATATACCATGGATGACAGGCTCATACAGGAC       |
| RHOM_04115_RP                    | G2T0V1                 | <i>RhLnb136<sub>II</sub></i>              | Reverse     | GGTGGTGGTGTCTCGAGGCCCAACGGAATAATCGTATTATCC |
| RHOM_04110_FP                    | G2T0V0                 | <i>RhLnb136<sub>I</sub></i>               | Forward     | AGGAGATATACCATGGATGAATCGGAAATATTGTCTGGAT   |
| RHOM_04110_RP                    | G2T0V0                 | <i>RhLnb136<sub>I</sub></i>               | Reverse     | GGTGGTGGTGTCTCGAGGCCCGCCCGGTTTTCTGA        |
| RHOM_04120_FP                    | G2T0V2                 | <i>RhGLnbp112</i>                         | Forward     | AGGAGATATACCATGGATGACTTTAAAAGAGGGACGTG     |
| RHOM_04120_RP                    | G2T0V2                 | <i>RhGLnbp112</i>                         | Reverse     | GGTGGTGGTGTCTCGAGGCCAATGTTATACCATTTAATCTCG |
| RHOM_04095 (AA36-454)_FP         | G2T0U7                 | <i>RhLNBBP</i>                            | Forward     | TTTCAGGGCGCCATGGGTGCAGCTGAAACCAGCC         |
| RHOM_04095 (AA36-454)_RP         | G2T0U7                 | <i>RhLNBBP</i>                            | Reverse     | GACGGAGCTCGAATTCTTATTACTAATGTTAAATTCAAC    |
| ROSEINA2194_01898 (AA26-861)_FP  | C0FT31                 | <i>RiLe<sup>a/b</sup><sub>II</sub>136</i> | Forward     | TTTCAGGGCGCCATGGGTAAATGCAGGGACAACCT        |
| ROSEINA2194_01898 (AA26-861)_RP  | C0FT31                 | <i>RiLe<sup>a/b</sup><sub>II</sub>136</i> | Reverse     | GACGGAGCTCGAATTCTTATCTTCTGTAAAGCTCAAATTCT  |
| ROSEINA2194_01899 (AA36-340)_FP  | C0FT32                 | <i>RiLe<sup>a/b</sup><sub>I</sub>136</i>  | Forward     | CAGCCATATGCTCGAGGGAGAAAATATTAAGATTCCAAAG   |
| ROSEINA2194_01899 (AA36-340)_RP  | C0FT32                 | <i>RiLe<sup>a/b</sup><sub>I</sub>136</i>  | Reverse     | CAGCCGGATCCTCGAGCTAATTCCATTTAATCGTATCG     |
| ROSEINA2194_01885_FP             | C0FT18                 | <i>RiGLnbp112</i>                         | Forward     | TTTCAGGGCGCCATGGGTAAATAAGAACACGGTGGAAGAGT  |
| ROSEINA2194_01885_RP             | C0FT18                 | <i>RiGLnbp112</i>                         | Reverse     | GACGGAGCTCGAATTCTTAAACAGCGTACCATTTAATCTCA  |
| ROSEINA2194_01895 (AA23-470)_FP  | C0FT28                 | <i>RiLe<sup>a/b</sup>BP</i>               | Forward     | TTTCAGGGCGCCATGGGAAATGCAAATACATCCGCAAACAC  |
| ROSEINA2194_01895 (AA23-470)_RP  | C0FT28                 | <i>RiLe<sup>a/b</sup>BP</i>               | Reverse     | GACGGAGCTCGAATTCTTATTGCGCAGTTTCTGAAACCTC   |
| ROSEINA2194_01891/01890_FP       | C0FT24/C0FT23          | <i>RiFuc29</i>                            | Forward     | TTTCAGGGCGCCATGGGGAGGACACCCGAAGAACAGA      |
| ROSEINA2194_01891/01890_RP       | C0FT24/C0FT23          | <i>RiFuc29</i>                            | Reverse     | GACGGAGCTCGAATTCTTATGATTCTTGATAAACCTCAA    |
| ROSEINA2194_01889/01888/01887_FP | C0FT22/C0FT21/C0FT20   | <i>RiFuc95</i>                            | Forward     | TTTCAGGGCGCCATGGGGGATTTAAGTAAATATGATATTTG  |
| ROSEINA2194_01889/01888/01887_RP | C0FT22/C0FT21/C0FT20   | <i>RiFuc95</i>                            | Reverse     | GACGGAGCTCGAATTCTTATCTGTAAATTTTGCATTTCT    |
| ROSEINA2194_02198 (AA29-975)_FP  | C0FTX7                 | <i>RiGH98</i>                             | Forward     | TTTCAGGGCGCCATGGGCAAACGGGATCAGAAT          |
| ROSEINA2194_02198 (AA29-975)_RP  | C0FTX7                 | <i>RiGH98</i>                             | Reverse     | GACGGAGCTCGAATTCTTAAACTATATCAAAATACACAT    |
| HMPREF0373_02965_FP              | U2PDT9                 | <i>ErLnb136</i>                           | Forward     | TTTCAGGGCGCCATGGGAAAATTGTGTGAAAATCAGCAGG   |
| HMPREF0373_02965_RP              | U2PDT9                 | <i>ErLnb136</i>                           | Reverse     | GACGGAGCTCGAATTCTTAAATCAGATGGATTTCTATTCTCC |
| HMPREF0373_02965_FP              | U2PDT9                 | <i>ErLnb136_Y145A</i>                     | Forward     | CGAAAACAGATCACCATGAGCCCTGGTAAACAGATCCTGG   |
| HMPREF0373_02965_RP              | U2PDT9                 | <i>ErLnb136_Y145A</i>                     | Reverse     | CCAGGATCTGTTTACCAGGGCTCATGGTGATCTGTTTTTCG  |

<sup>a</sup> UniProtKB accession number

## Supplementary Figures:

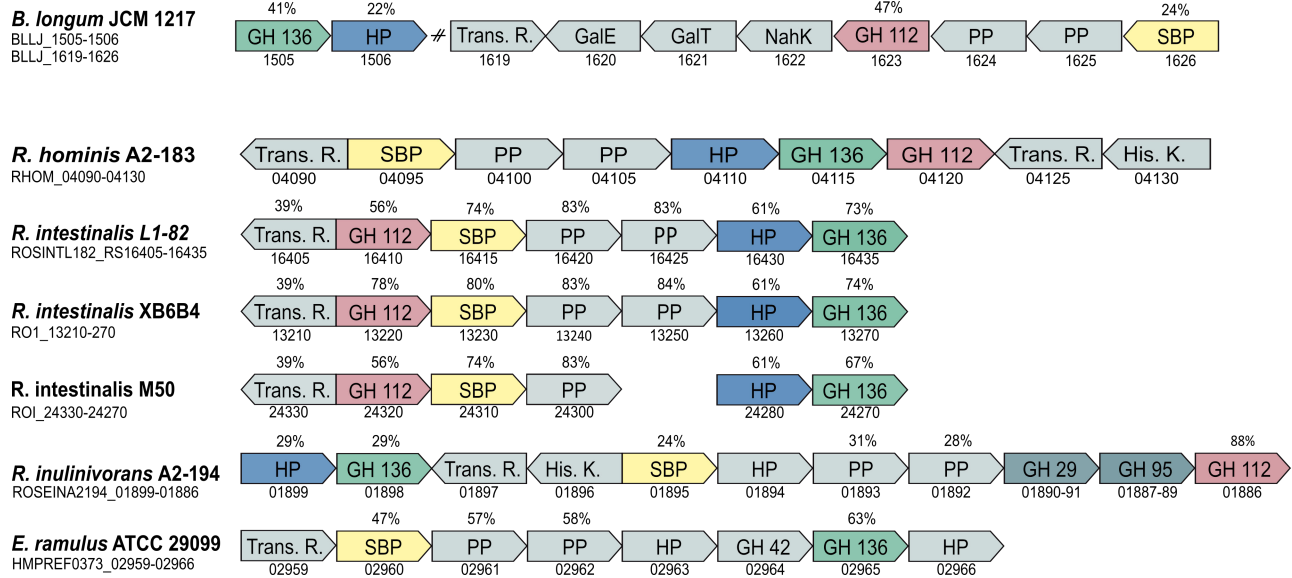

**Supplementary Fig. 1: The conservation of the HMO utilization loci within *Roseburia* spp. and *Eubacterium ramulus*.** The isolated loci encoding the GH136 and the LNB/GNB utilisation in *Bifidobacterium longum* subsp. *longum* JCM 1217 are included for comparison. Gene locus IDs are below the genes, which are denoted according to their protein products: UDP-glucose/GlcNAc 4-epimerase (GalE); UDP-glucose-hexose 1-phosphate uridylyl transferase (GalT); *N*-Acetylhexosamine 1-kinase (NahK); transcriptional regulator (Trans. R.); ABC transporter solute binding protein (SBP); ABC transporter permease protein (PP); Hypothetical proteins (HP), glycoside hydrolase (GH) and histidine kinase sensory protein (His. K.). Sequence identities to the *R. hominis* A2-183 corresponding homologs are above the genes. Genes encoding GH136 family members were identified via the dbCAN database.

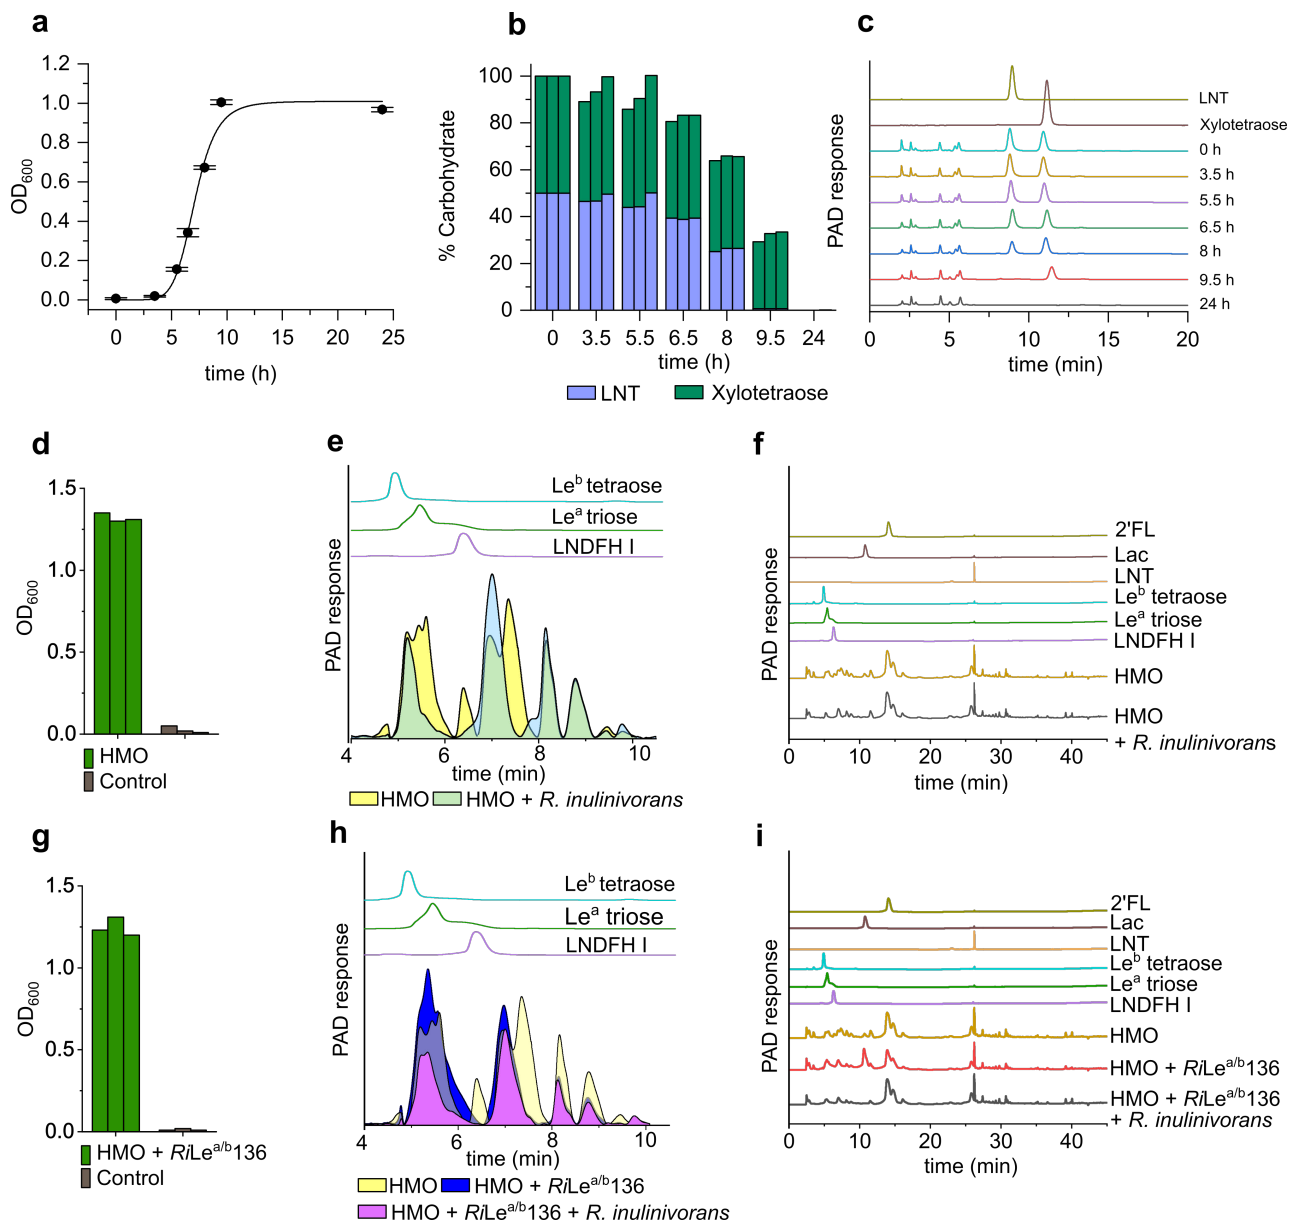

**Supplementary Fig. 2: Oligosaccharide uptake profiles of *Roseburia*.** (a-c), Oligosaccharide uptake of *R. hominis* during growth on an equimolar LNT and xylotetraose mixture. (a), Growth curve of *R. hominis* on YCFA supplemented with 0.5% (w/v) of an equal mixture of xylotetraose and LNT. (b), Time course of relative percentages of xylotetraose and LNT in culture supernatants from (a) calculated based on HPAEC-PAD analyses as exemplarily represented in (c). (c), HPAEC-PAD chromatograms showing time course analysis of culture supernatants of *R. hominis* grown on YCFA supplemented with 0.5% (w/v) of an equal mixture of xylotetraose and LNT. (d-i), HMO uptake preference of *R. inulinivorans* growth on 0.5% purified HMOs from mother's milk. (d) Growth levels from *R. inulinivorans* on HMOs from mother's milk within 24h including a non-carbon source control and (e-f) HPAEC-PAD chromatograms ((e) segment 4-10 min selected from (f) full elution profile) showing the time course analysis of culture supernatants of *R. inulinivorans* as grown in (d). (g) Growth levels from *R. inulinivorans* on HMOs from mother's milk previously digested with RiLe<sup>a/b</sup>136 (0.5 μM for 18h) within 24h including a non-carbon source control and (h-i) HPAEC-PAD chromatograms ((h) segment 4-10 min selected from (i) full elution profile) showing the time course analysis of culture supernatants of *R. inulinivorans* as grown in (g). Observed peaks between 0 and 6 minutes (c) and observed peaks between 0 and 4 minutes (f and g) are medium components. Growth experiment (a, d and g) were performed as independent biological triplicates (n=3.) and the growth data in (a) are represented as mean values with the error bars showing the standard deviation (SD). The HPAEC-PAD analyses (b, c, e, f, h and i) were performed in triplicates (one analysis from each biological growth condition replicate) whereby all analyses yielded similar results. Source data are provided as a Source Data file labelled with the corresponding figure number and panel definition.

**a** *R. inulinivorans* L-fucose acid utilization locus

| Locus ID | Log2 fold change |           | Protein | Annotation                                    |
|----------|------------------|-----------|---------|-----------------------------------------------|
|          | HMOs/Glc         | Mucin/Glc |         |                                               |
| 01688    |                  |           |         | Transcriptional regulator                     |
| 01689    | 6.64             | 6.64      | fucI    | L-fucose isomerase                            |
| 01690    |                  |           |         | Hypothetical protein                          |
| 01691    | 2.52             |           | ABC-PP  | ABC transporter, permease protein             |
| 01692    | 3.04             | 6.64      | ABC-PP  | ABC transporter, permease protein             |
| 01693    | 5.18             | 4.72      | ABC-PP  | ABC transporter, permease protein             |
| 01694    |                  |           | ABC-PP  | ABC transporter, permease protein             |
| 01695    | 5.59             | 6.64      | ABC-SBP | ABC, solute binding protein                   |
| 01696    | 1.65             | 2.1       |         | FucU transport protein                        |
| 01697    | 0.37             |           |         | Hypothetical protein                          |
| 01698    |                  |           |         | Carbohydrate kinase                           |
| 01699    | 1.15             | 1.92      | fucK    | L-fuculokinase                                |
| 01700    | 1.87             |           |         | Nucleotide binding domain ParA family protein |
| 01701    | 1.74             | 1.71      |         | Hypothetical protein                          |
| 01702    | 1.46             |           |         | Hypothetical protein                          |
| 01703    | 2.58             | 5.2       |         | BMC domain protein                            |
| 01704    |                  |           |         | Ethanolamine/Propanediol utilization protein  |
| 01705    | 3.82             | 3.64      | fucA    | L-fuculophosphate aldolase                    |
| 01706    | 2.43             |           |         | Hypothetical protein                          |
| 01707    | 3.97             | 3.35      |         | Hypothetical protein                          |
| 01708    | 3.15             | 3.68      |         | CoA dependent aldehyd dehydrogenase           |
| 01709    | 3.83             | 4.12      |         | Alcohol dehydrogenase                         |
| 01710    | 2.77             | 4.24      |         | BMC domain protein                            |
| 01711    | 3.21             | 3.12      |         | BMC domain protein                            |
| 01712    | 2.49             | 3.01      |         | BMC domain protein                            |
| 01713    | 2.73             | 2.67      |         | BMC domain protein                            |
| 01714    | 3.39             | 3.64      |         | Phosphate propanoyltransferase                |
| 01715    | 4.27             |           |         | Ethanolamine/Propanediol utilization protein  |
| 01716    | 3.07             | 2.29      |         | NADH dehydrogenase like subunit protein       |
| 01717    | 2.11             | 2.52      |         | BMC domain protein                            |
| 01718    | 2.65             |           |         | Transcriptional regulator                     |
| 01719    | 3.14             | 2.82      |         | Propandiol dehydratase                        |
| 01720    | 2.64             |           |         | Pyruvate lyase                                |

**b** *R. inulinivorans* N-acetylneuraminic acid utilization locus

| Locus ID | Log2 fold change |           | Protein | Annotation                                |
|----------|------------------|-----------|---------|-------------------------------------------|
|          | HMOs/Glc         | Mucin/Glc |         |                                           |
| 00873    |                  |           |         | Transcriptional regulator                 |
| 00874    | 2.11             | 1.32      | nagB    | glucosamine-6-phosphate deaminase         |
| 00875    | 0.28             | 1.65      |         | Transcriptional regulator                 |
| 00876    | 2.96             | 4.71      |         | ABC transporter, solute binding protein   |
| 00877    |                  |           |         | Hypothetical protein                      |
| 00878    |                  |           | ABC-PP  | ABC transporter, permease protein         |
| 00879    |                  |           | ABC-PP  | ABC transporter, permease protein         |
| 00880    | 2.57             | 5.02      | nanA    | N-acetylneuraminase lyase                 |
| 00881    | 1.95             | 3.67      | YhcH    | YhcH family protein                       |
| 00882    | 2.71             | 4.25      | nanE    | N-acetylmannosamine-6-phosphate epimerase |
| 00883    | 2.89             | 4.65      | nanK    | N-acetylmannosamine kinase                |
| 00884    | 1.52             | 3.21      | AE      | Acetyltransferase                         |

**Supplementary Fig. 3: *R. inulinivorans* upregulated L-fucose and N-acetylneuraminic acid utilization loci. (a)** Upregulation of L-fucose utilization cluster of *R. inulinivorans*. **(b)** Upregulation of putative N-acetylneuraminic acid utilization cluster of *R. inulinivorans* cells grown on purified HMOs from mother's milk and mucin, respectively, relative to glucose (Glc). **(a,b)** The heat maps depict Log2-fold changes of proteins expressed by cells grown on HMOs or mucin, respectively, relative to glucose. Locus numbers Roseina2194\_XXXX are abbreviated with the last numbers after the hyphen.

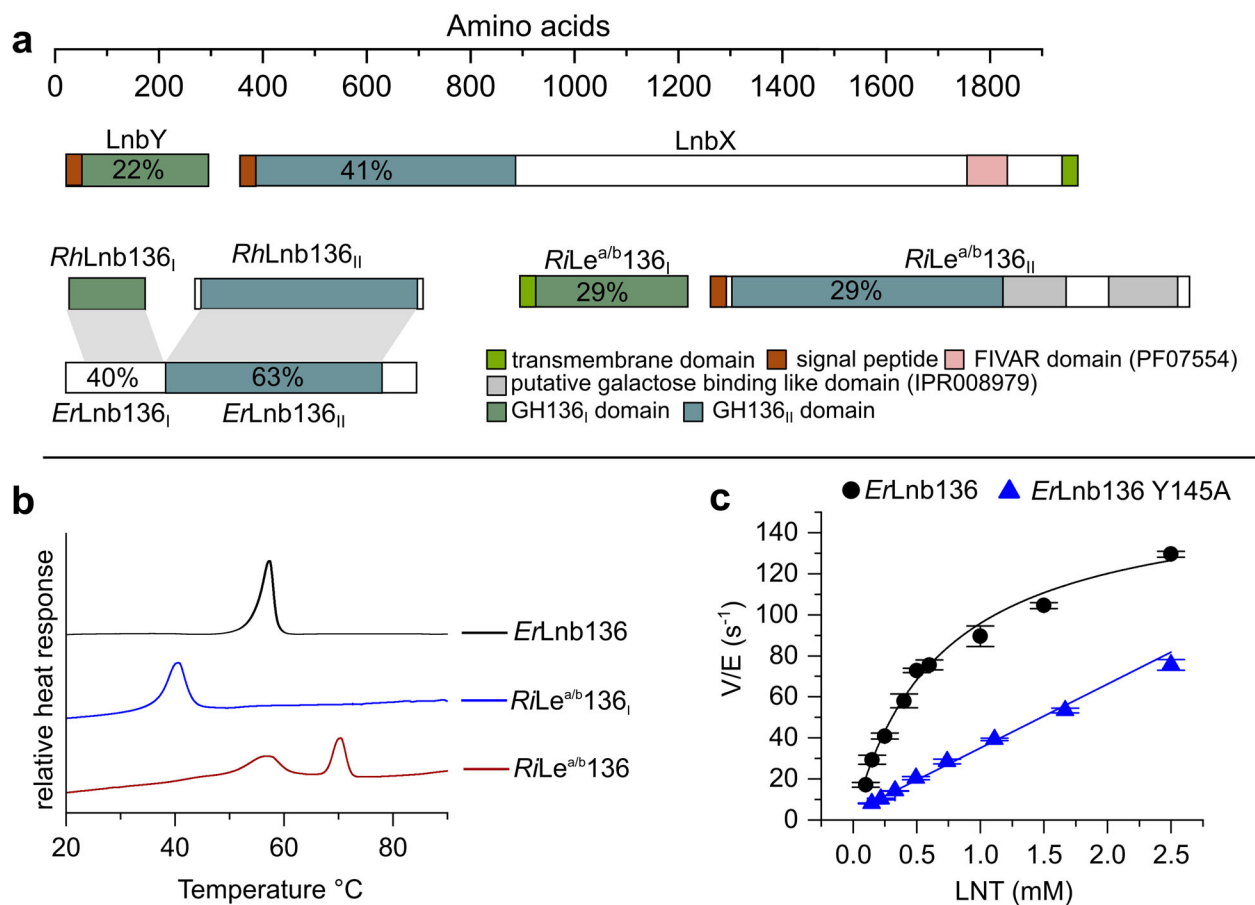

**Supplementary Fig. 4: Organization, stability and functional interactions of GH136 domains.** (a) Domain organization of GH136 enzymes in *B. longum* (LnbY, LnbX), *R. inulinivorans* (Ri), *R. hominis* (Rh) and *E. ramulus* (Er). Amino acid sequence identities to the corresponding *R. hominis* homologues are indicated within the genes. (b) Differential scanning calorimetry thermograms showing the unfolding of *ErLnb136* and of *RiLe<sup>a/b</sup>136<sub>I</sub>* and *RiLe<sup>a/b</sup>136*. The unfolding of the two domains of *ErLnb136* appears to overlap giving rise to a single asymmetric thermal transition consistent with the cooperative unfolding of the domains. By contrast, the unfolding of *RiLe<sup>a/b</sup>136* features two well resolved transitions, the first is likely attributed to the unfolding of the *RiLe<sup>a/b</sup>136<sub>I</sub>* domain while the second is likely to be attributed to the unfolding of the remaining part of the protein including the *RiLe<sup>a/b</sup>136<sub>II</sub>* domain. (c), Hydrolysis kinetics of *ErLnb136* and the mutant *ErLnb136* Y145A on LNT. DSC analyses (b) were performed as duplicates whereby all analyses yielded similar results and kinetic measurements (c) were performed as triplicates. Source data are provided as a Source Data file labelled with the corresponding figure number and panel definition.



**a** *RiLe<sup>a/b</sup>136* on HMOs

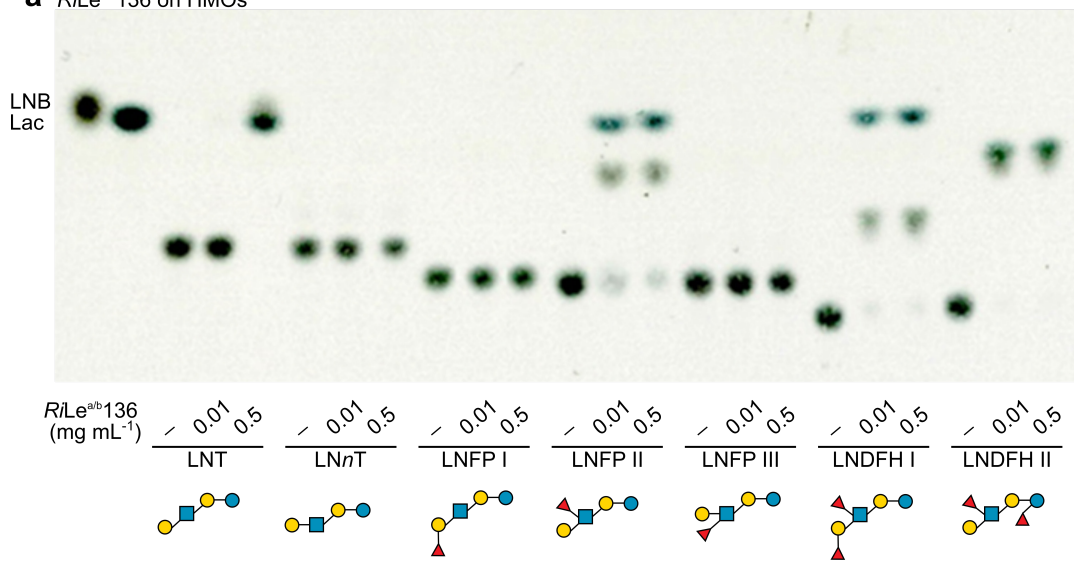

**b** *RiFuc95* on HMOs

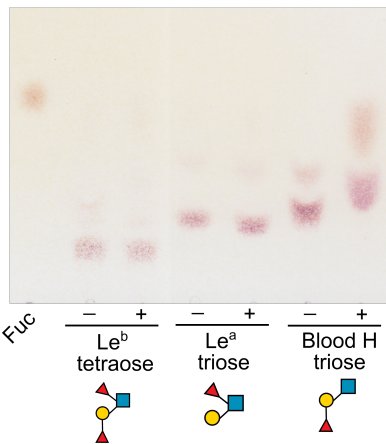

**c** *RiFuc29* on HMOs

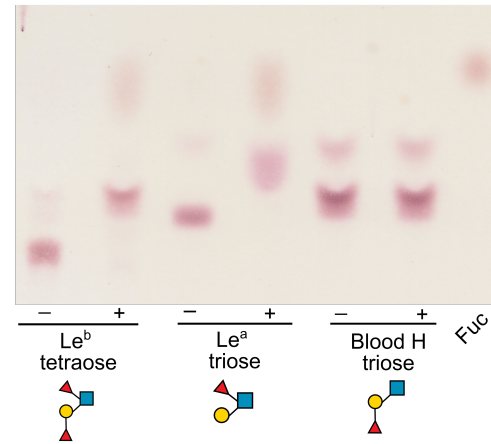

**d** *RiFuc29*+*RiFuc95* on Le<sup>b</sup> tetraose

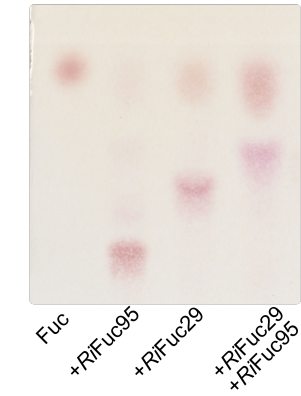

**e** *RiGLnbp112* on LNB and GNB

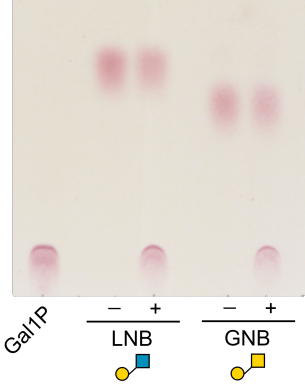

**f** *RhGLnbp112* on LNB and GNB

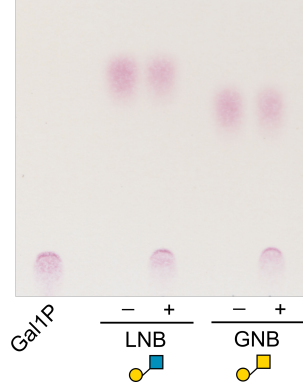

**Supplementary Fig. 5: Substrate preference of *RiLe<sup>a/b</sup>136* and intracellular decomposition of GH136 degradation products in *Roseburia*.** (a), Substrate preference of *RiLe<sup>a/b</sup>136* towards HMOs; reactions with 0.01 or 0.5 mg mL<sup>-1</sup> of *RiLe<sup>a/b</sup>136*, respectively. (b), Fucosidase activity of *RiFuc95* on HMOs. (c), Fucosidase activity of *RiFuc29* on HMOs. (d), Complete defucosylation of Le<sup>b</sup> tetraose by orchestral action of *RiFuc29* and *RiFuc95*. Data show hindrance of *RiFuc95* by  $\alpha$ -(1→2)-linked L-fucose on Le<sup>b</sup> tetraose. (e), Phosphorylase activity of *RiGLnbp112*. (f), Phosphorylase activity of *RhGLnbp112*. (a-f), +: reactions with enzyme, -: controls without enzyme. Analyses were performed in independent duplicates whereby all analyses yielded similar results. Source data are provided as a Source Data file labelled with the corresponding figure number and panel definition.



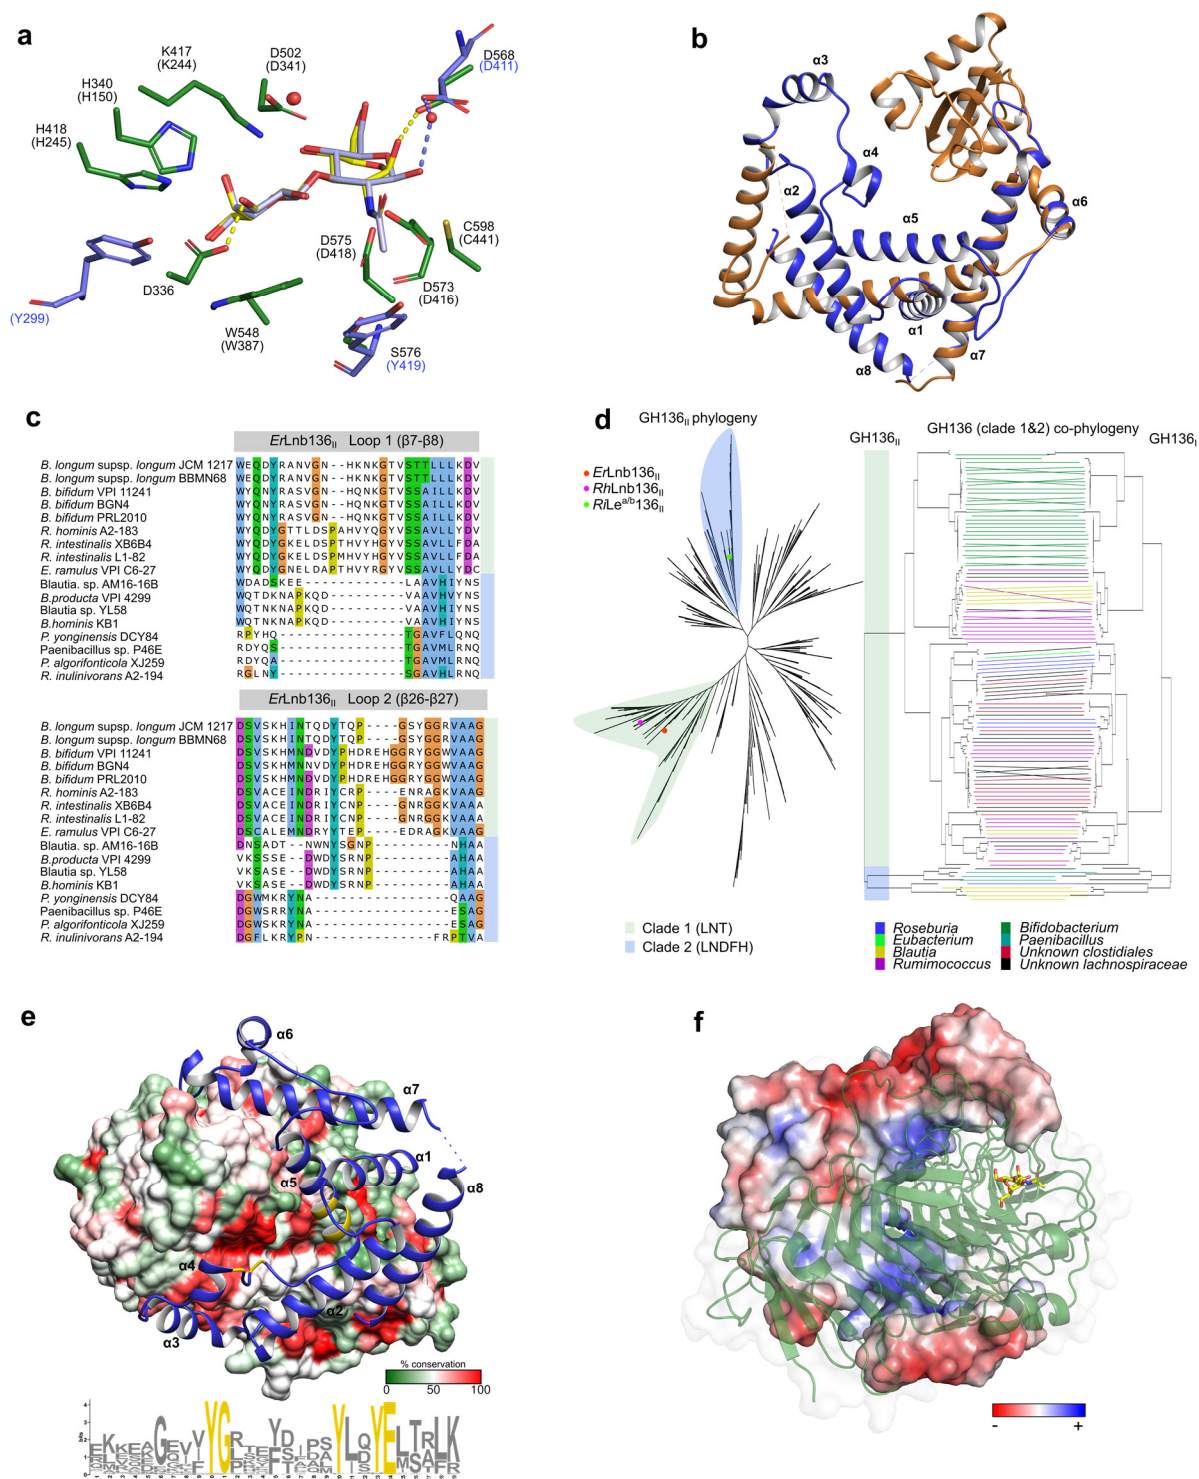

**Supplementary Fig. 6: Evolution of GH136 enzymes.** (a) Superimposition of LNB (yellow) bound in *ErLnb136* (green) and LNB (grey) in *B/LnbX* from *B. longum* (light blue). Conserved residues are shown for *ErLnb136* and *B/LnbX* (in parentheses). Residues Y299, Y419 and D411 of *B/LnbX* that are variant compared to *ErLnb136* are shown in light blue to highlight differences in active site architecture and ligand binding. Water molecules are red spheres and hydrogen bonds are dashed lines in *ErLnb136* (yellow) and *B/LnbX* (light blue). (b) Superimposition of *ErLnb136<sub>i</sub>* (blue) and most related structural homolog 5E21 (chain A) from *Heliobacter pylori* (orange), highlighting the large differences in protein fold. (c) Partial amino acid sequence alignment of GH136<sub>ii</sub> domains showing shortened loops around the active site in *R. inulinivorans* as compared to *ErLnb136* of *E. ramulus* (d) Phylogenetic tree of 985 GH136<sub>ii</sub> sequences identified by BLASTP search of *RhLnb136<sub>ii</sub>* or *RiLe<sup>ab</sup>136<sub>ii</sub>* against non-redundant database (sequences with an e-values < 10<sup>-10</sup> are included). Tanglegram showing co-evolution of GH136<sub>i</sub> and GH136<sub>ii</sub> domains across 117 selected sequences of GH136<sub>ii</sub> phylogenetic tree clade 1 and clade 2. (e) Surface of *ErLnb136<sub>ii</sub>* coloured by amino acid sequence conservation across 117 sequence as presented in (d) and cartoon presentation (blue) of *ErLnb136<sub>i</sub>* with conserved residues (yellow) as identified from a sequence motif generated via the MEME suite from 117 GH136<sub>i</sub> sequences as in (d). (f) Electrostatic surface of *ErLnb136<sub>i</sub>* and cartoon presentation of *ErLnb136<sub>ii</sub>* (green).

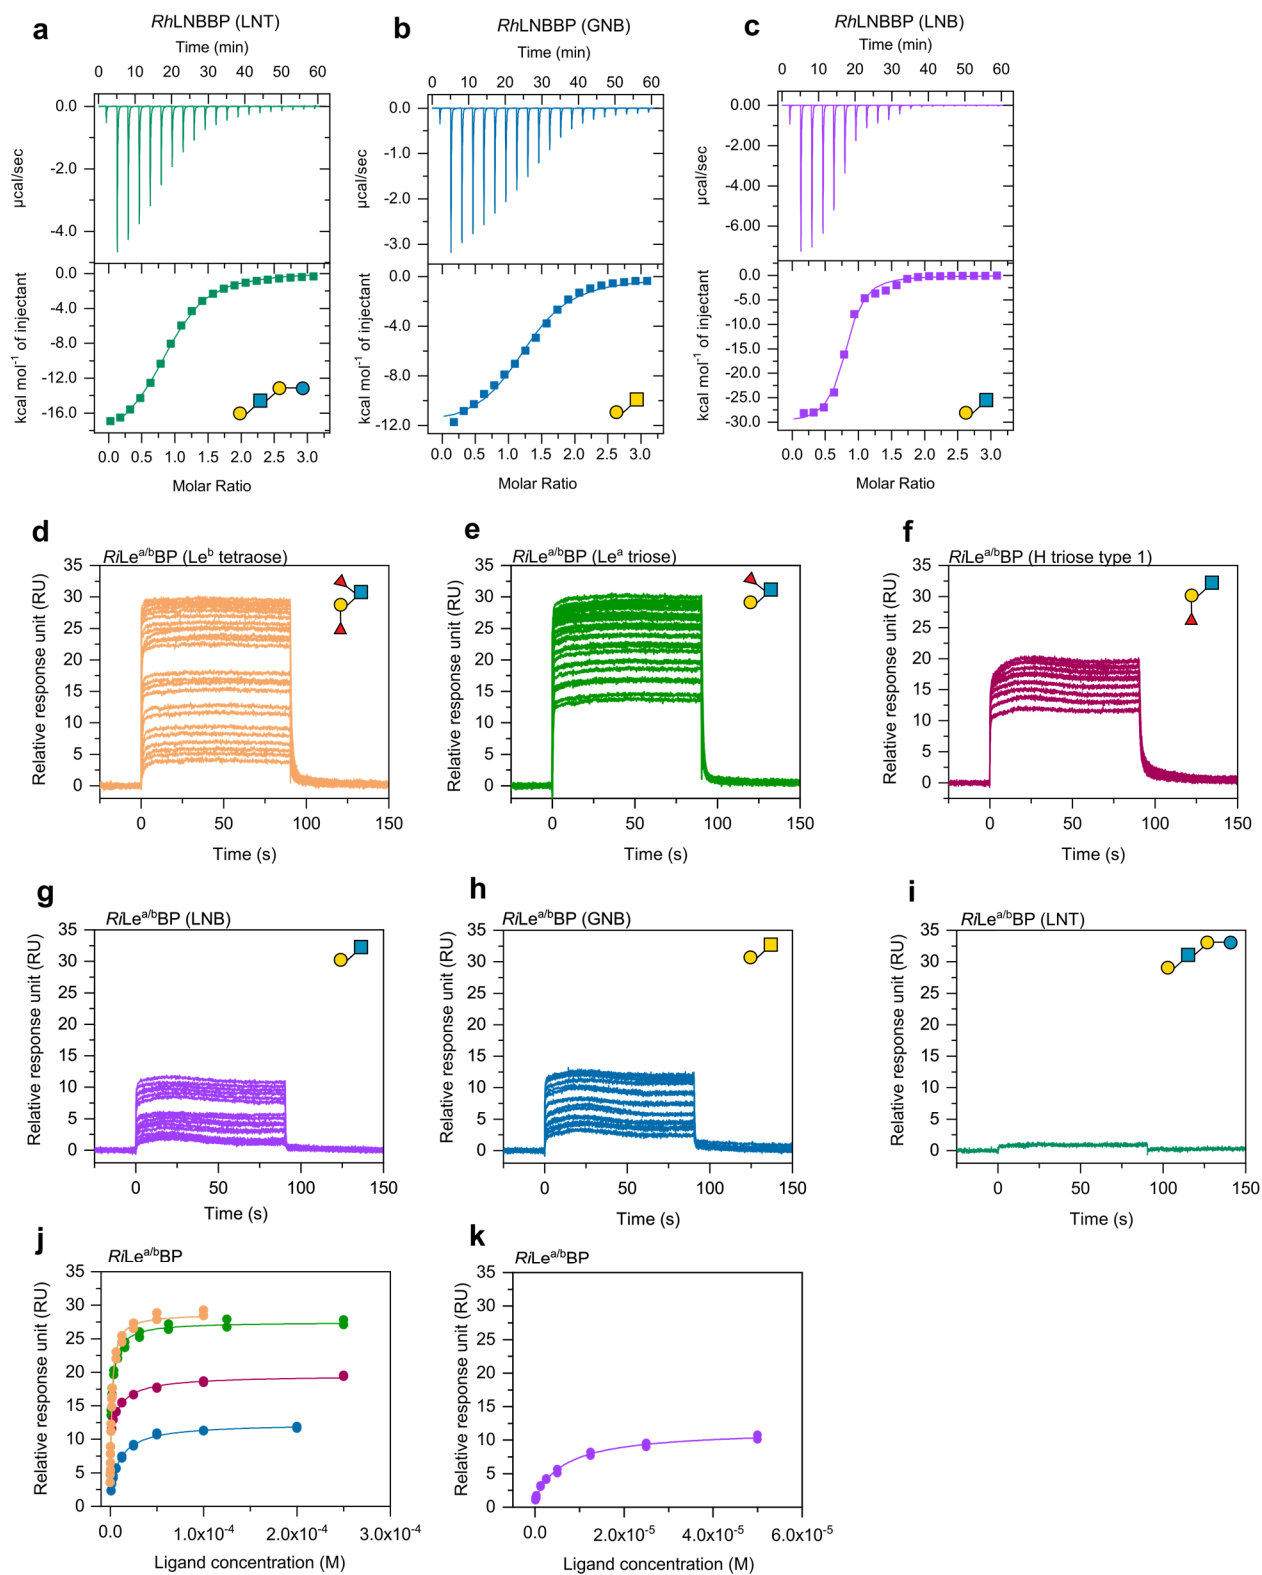

**Supplementary Fig. 7: Binding of *RhLNBBP* and *RiLe<sup>a/b</sup>BP* to HMOs.** (a-c) ITC analysis of *RhLNBBP* to selected HMOs. (d-i) Reference and blank corrected sensograms illustrating binding of selected HMOs to *RiLe<sup>a/b</sup>BP*. (j-k) One binding model fitted to the binding isotherms from the sensograms in (d-i). ITC and SPR experiments were performed as duplicates ( $n=2$ , independent experiments).

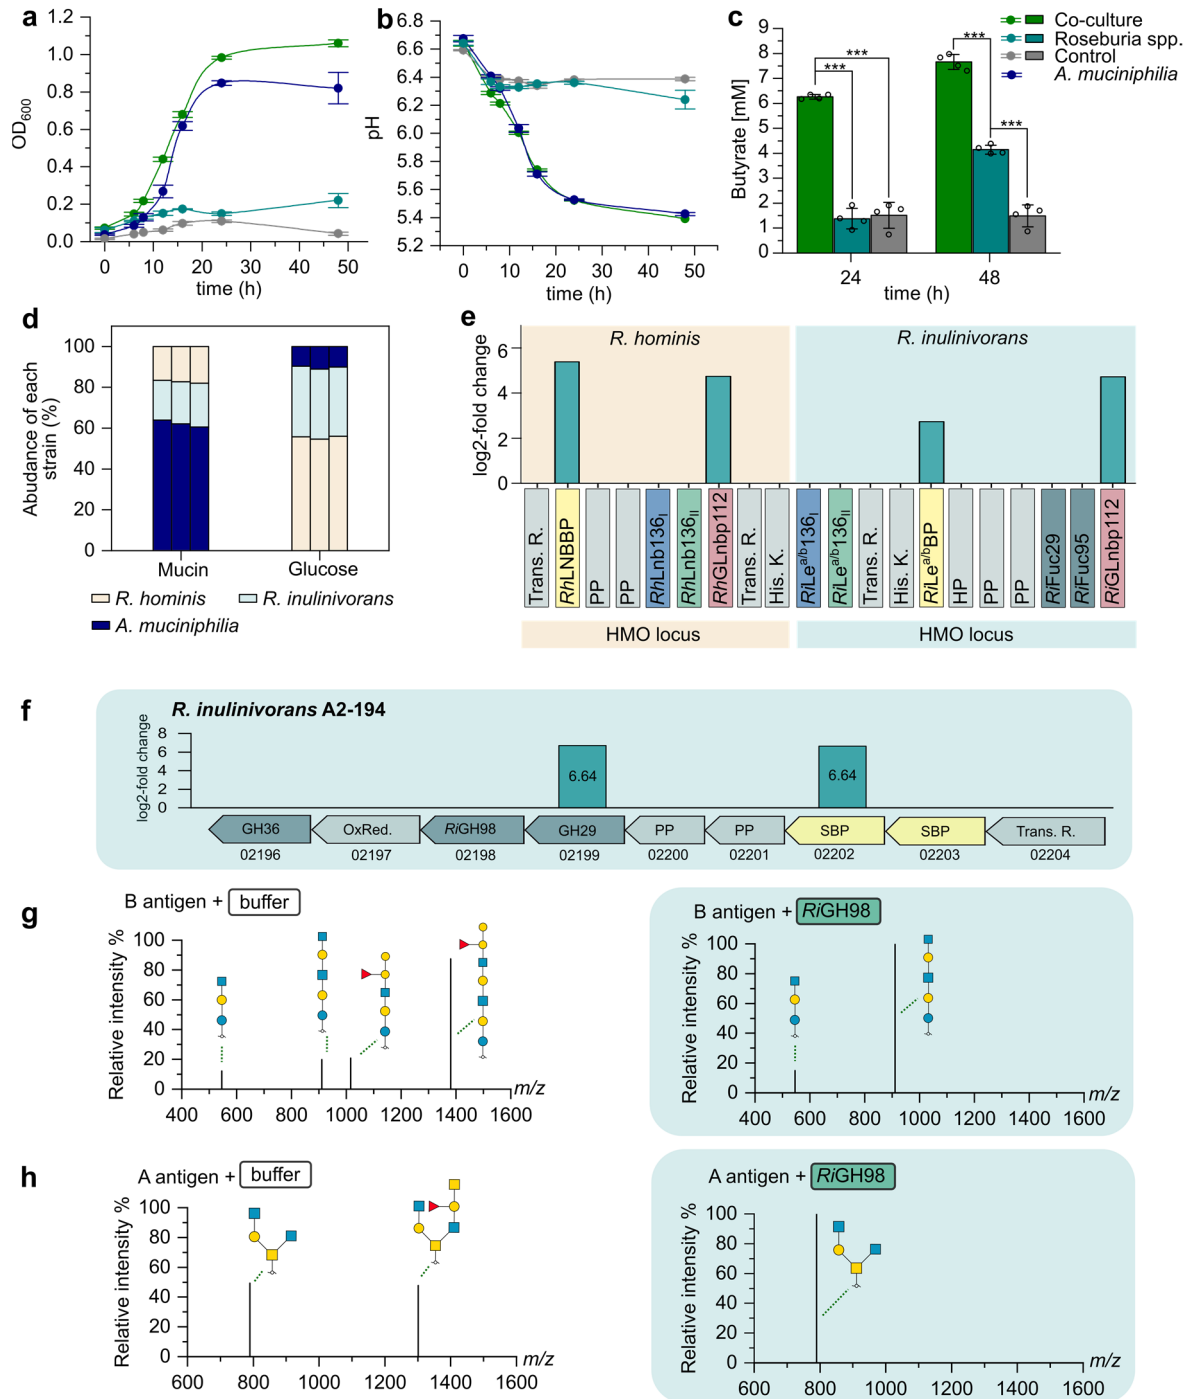

**Supplementary Fig. S8: Cross-feeding of *Roseburia* in *A. muciniphilia* co-cultures on mucin. (a-b)**, Growth of monocultures and co-cultures of *Roseburia* spp. and *A. muciniphilia* on mucin. **(c)**, Butyrate in culture supernatants of monocultures and co-cultures as in (a) at 24h and 48h. **(d)**, Relative strain abundance during growth of co-cultures on mucin and glucose at 16 h determined based on MS/MS analyses. **(e)**, Upregulated proteins in the HMOs locus of *R. hominis* and *R. inulinivorans* cells grown in mucin co-culture with *A. muciniphilia* relative to glucose. **(f)**, Upregulated proteins in putative blood group utilization locus of *R. inulinivorans* cells as in (e). **(g-h)** Degradation of Blood group antigen A and B by *RiGH*98 analysed by nano LC-MS. **(a-c)**, Growth cultures and butyrate quantification were performed in four replicates (n=4 independent experiments) and data are presented as mean values with the error bars representing the standard deviation (SD). **(c)** An unpaired two-tailed Student's *t*-test was used to determine the statistical significance between reached butyrate concentrations, whereby following *p* values were obtained, Co-culture versus *Roseburia* spp:  $p=8.56 \times 10^{-5}$  (24h),  $p=1.03 \times 10^{-6}$  (48h); Co-culture versus control  $p=2.56 \times 10^{-4}$  (24h) and *Roseburia* spp. versus control  $p=7.68 \times 10^{-5}$  (48h). **(e-h)** Proteomics analyses originate from biological triplicates and nano LC-MS analyses were performed in duplicates. **(c)** Three asterisk (\*\*\*) indicate a statistically significant difference at a level of  $p < 0.001$  **(e)**, Protein annotation: transcriptional regulator (Trans. R.); ABC transporter solute binding protein (*RhLNB*BP) (f) and *RiLe*<sup>alb</sup>BP (g); ABC transporter permease protein (PP); hypothetical proteins (HP); Glycoside hydrolase 136 (*RhLNB*136<sub>I</sub>, *RhLNB*136<sub>II</sub>) (f) and *RiLe*<sup>alb</sup>136<sub>I</sub>, *RiLe*<sup>alb</sup>136<sub>II</sub> (g); Glycoside hydrolase 112 (*RhGLnbp* 112 (f) and *RiGLnBP* 112 (g)); Glycoside hydrolase 29 (*RiFuc*29 (g)); Glycoside hydrolase 95 (*RiFuc*95 (g)) and histidine kinase sensory protein (His. K.). Source data are provided as a Source Data file labelled with the corresponding figure number and panel definition.

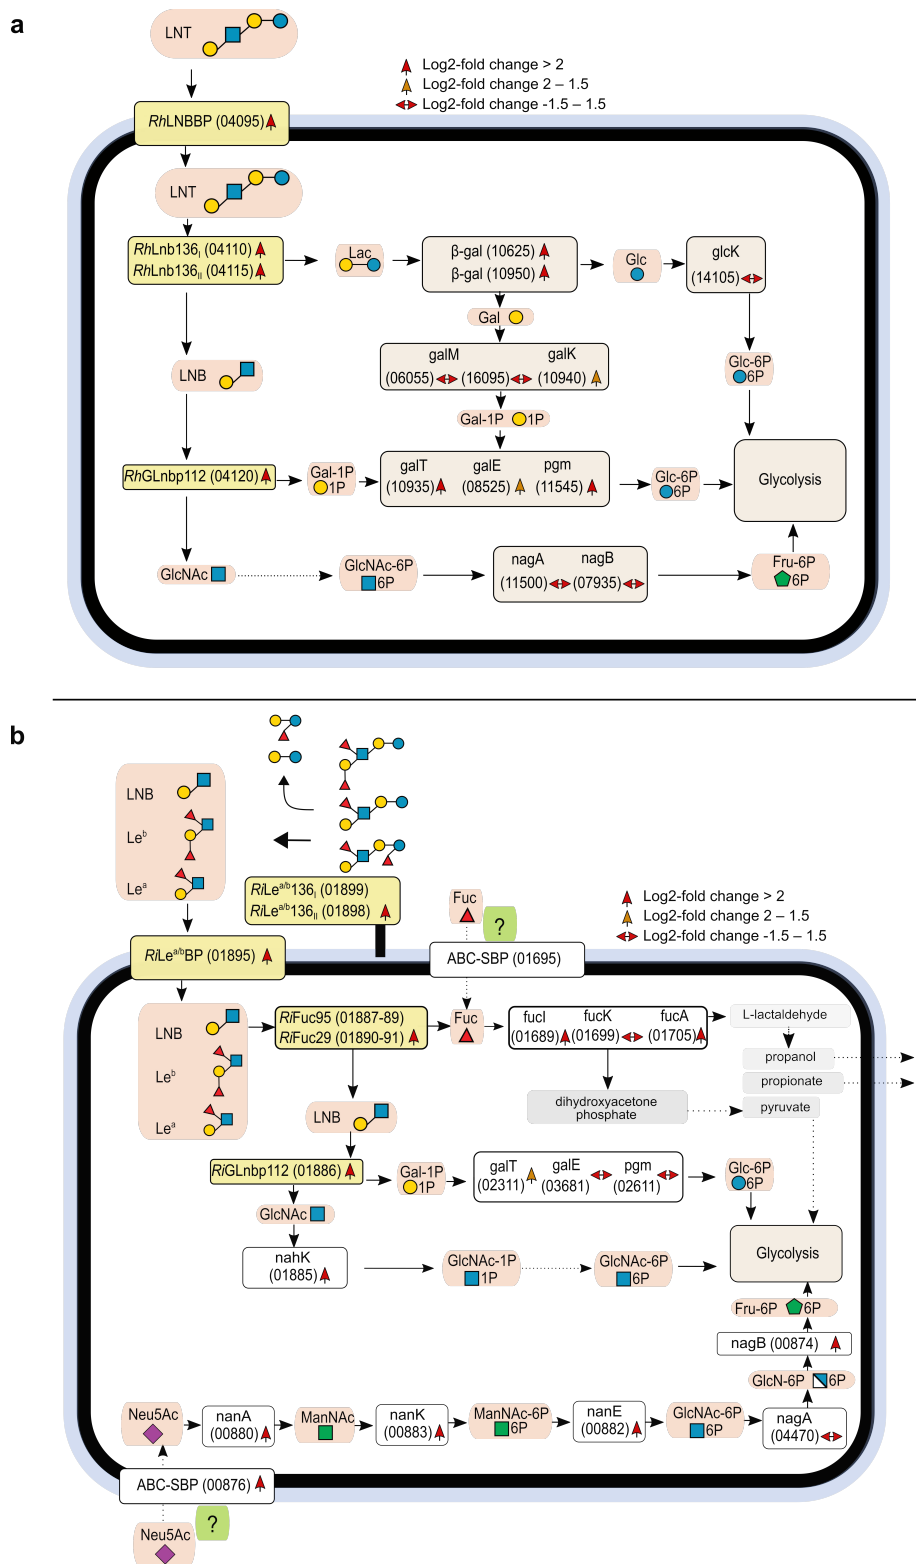

**Supplementary Fig. 9: Proposed HMOs core degradation pathways of *R. hominis* and *R. inulinivorans*.** (a) Proposed model for LNT utilization in *R. hominis* and (b) for fucosylated HMOs utilization in *R. inulinivorans*, based on proteomics data of cells grown on LNT (a, *R. hominis*) and HMOs from mother's milk (b, *R. inulinivorans*) relative to glucose. Enzymatic steps suggested from literature and detected in proteomics data are indicated in solid arrows, steps suggested by literature but not detected in proteomics data are shown as dotted arrows. Characterized proteins in the present study are highlighted in yellow squares and Locus IDs of *R. hominis* (Rhom\_xxxxx) and *R. inulinivorans* (Roseina2194\_xxxxx) are abbreviated with the last numbers after the hyphen.
